# Supplementary material for: Microbiological Contamination of the Office Environment in Dental and Medical Practice
Source: MDPI journal article supplement (doi:10.3390/antibiotics10111375), 2021-11-10
Supplement: s1 [file s1]

## Supplementary Materials

### Microbiological Contamination of the Office Environment in Dental and Medical Practice

**Table S1.** Comparison of the median microbiological contamination of surface (CFU/100 cm<sup>2</sup>) and air samples (CFU/m<sup>3</sup>) of dental (D) and general practitioner (GP) rooms.

| Contamination | Air           |     |                 |               |     |                 | Surfaces         |     |                 |                     |    |                 |
|---------------|---------------|-----|-----------------|---------------|-----|-----------------|------------------|-----|-----------------|---------------------|----|-----------------|
|               | Waiting rooms |     |                 | Waiting rooms |     |                 | Consulting rooms |     |                 | Sterilization rooms |    |                 |
|               | D             | GP  | <i>p</i> -value | D             | GP  | <i>p</i> -value | D                | GP  | <i>p</i> -value | D                   | GP | <i>p</i> -value |
| Bacteria      | 382           | 424 | 1               | 114           | 148 | 0.7             | 102              | 140 | 0.2             | 118                 | NA | NA              |
| Fungi         | 112           | 460 | 0.3             | 28            | 64  | 0.3             | 14               | 44  | 0.07            | 8                   | NA | NA              |

**Table S2.** Comparison (*p*-value) of the median microbiological contamination of surfaces between the rooms of dental and general practitioner (GP) offices.

| Contamination | GP's offices                       |  | Dental offices                     |                                       |                                          |  |
|---------------|------------------------------------|--|------------------------------------|---------------------------------------|------------------------------------------|--|
|               | Waiting <i>vs</i> consulting rooms |  | Waiting <i>vs</i> consulting rooms | Waiting <i>vs</i> sterilization rooms | Consulting <i>vs</i> sterilization rooms |  |
| Bacteria      | 0.9                                |  | 0.5                                | 0.8                                   | 0.8                                      |  |
| Fungi         | 0.5                                |  | 0.1                                | 0.04                                  | 0.7                                      |  |
